# BRAF<sup>V600E</sup> Promotes Invasiveness of Thyroid Cancer Cells through Nuclear Factor $\kappa$ B Activation

Iryna Palona, Hiroyuki Namba, Norisato Mitsutake, Dmytro Starenki, Alexei Podtcheko, Ilya Sedliarou, Akira Ohtsuru, Vladimir Saenko, Yuji Nagayama, Kazuo Umezawa, and Shunichi Yamashita

Department of Molecular Medicine (I.P., H.N., N.M., A.P., I.S., S.Y.), Department of International Health and Radiation Research (V.S., S.Y.), and Department of Medical Gene Technology (Y.N.), Nagasaki University Graduate School of Biomedical Sciences, Nagasaki 852-8523, Japan; Takashi Nagai International Hibakusha Medical Center (A.O., S.Y.), Nagasaki University Hospital, Nagasaki 852-8501, Japan; Department of Applied Chemistry (K.U.), Faculty of Science and Technology, Keio University, Yokohama 223-0061, Japan; and The Research Institute of Personalized Health Sciences (D.S.), Health Sciences University of Hokkaido, Hokkaido 061-0293, Japan

The BRAF<sup>V600E</sup> mutation is closely linked to tumorigenesis and malignant phenotype of papillary thyroid cancer. Signaling pathways activated by BRAF<sup>V600E</sup> are still unclear except a common activation pathway, MAPK cascade. To investigate the possible target of BRAF<sup>V600E</sup>, we developed two different cell culture models: 1) doxycycline-inducible BRAF<sup>V600E</sup>-expressing clonal line derived from human thyroid cancer WRO cells originally harboring wild-type BRAF; 2) WRO, KTC-3, and NPA cells infected with an adenovirus vector carrying BRAF<sup>V600E</sup>. BRAF<sup>V600E</sup> expression induced ERK phosphorylation and cyclin D1 expression in these cells. The BRAF<sup>V600E</sup>-overexpressing cells also showed an increase of nuclear factor  $\kappa$ B (NF- $\kappa$ B) DNA-binding activity, resulting in

up-regulation of antiapoptotic c-IAP-1, c-IAP-2, and X-linked inhibitor of apoptosis. Furthermore, BRAF<sup>V600E</sup> expression also induced the expression of matrix metalloproteinase and cell invasion into matrigel through NF- $\kappa$ B pathway. Increased invasive ability by BRAF<sup>V600E</sup> expression was significantly inhibited by a specific NF- $\kappa$ B inhibitor, racemic dehydroxymethyllethylepoxyquinomicin. These data indicate that BRAF<sup>V600E</sup> activates not only MAPK but also NF- $\kappa$ B signaling pathway in human thyroid cancer cells, leading to an acquisition of apoptotic resistance and promotion of invasion. Inactivation of NF- $\kappa$ B may provide a new therapeutic modality for thyroid cancers with BRAF<sup>V600E</sup>. (*Endocrinology* 147: 5699–5707, 2006)

THE BRAF GENE encodes a serine/threonine kinase that is a member of RAF family and transmits a signal from RAS to MAPK pathway. The MAPK signaling pathway regulates diverse physiological processes including cell growth, differentiation and apoptosis. BRAF somatic mutations have been identified in various types of human cancers including melanomas and colorectal and ovarian cancers (1). The BRAF mutations are the most prevalent genetic alteration (36–69%) in papillary thyroid cancers (PTCs), the most common type of endocrine malignancy (2–9). Activating BRAF mutations mainly occur in two regions of the kinase domain, the glycine-rich loop and the activation segment. The mutation in PTC is almost exclusively a thymine-to-adenine transversion at nucleotide 1799 (T1799A) in exon 15, resulting in a valine-to-glutamic acid substitution at amino acid residue 600 (V600E). This mutation produces a constitutively active kinase by disrupting hydrophobic interactions between residues in the activation loop and residues in the ATP binding site that maintain the inactive conformation, allowing de-

velopment of new interactions that fold the kinase into a catalytically competent structure (1, 10).

Several studies have reported that the BRAF mutation is related to poor prognostic factors in patients with PTC (6, 8), whereas others have not found association between the mutation and any clinicopathological characteristics (11–14). The apparent controversy between these reports is likely due in part to histological diversity of PTC sample sets analyzed by different groups. A recent multicenter study of a large series of PTCs has shown that the BRAF mutation is associated with extrathyroidal invasion, lymph node metastasis, and tumor recurrence, even in patients with stage I/II initial disease (15). Thus, the BRAF mutation seems to be a predictor of poorer prognosis of PTCs.

Transgenic mice overexpressing BRAF<sup>V600E</sup> in their thyroids developed PTCs with high penetrance after 12 wk of age (16). The histological examination showed tall-cell features, areas of invasion, and foci of poorly differentiated carcinoma. These findings suggest that BRAF<sup>V600E</sup> confers on cancer cells malignant properties such as invasion. However, the underlying molecular mechanism still remains unknown.

CRAF (Raf-1), another member of RAF kinase family, has been shown to activate nuclear factor  $\kappa$ B (NF- $\kappa$ B) (17–20). NF- $\kappa$ B is a transcription factor consisting of a heterodimeric or homodimeric complex. When inactive, this complex is sequestered in the cytoplasm by I $\kappa$ B, which is thought to mask the nuclear localization signal of NF- $\kappa$ B. Once I $\kappa$ B is phosphorylated by upstream kinases, it is subjected to ubiquitination followed by proteosomal degradation, allowing

First Published Online September 7, 2006

Abbreviations: DHMEQ, Racemic dehydroxymethyllethylepoxyquinomicin; Dox, doxycycline; ECM, extracellular matrix; GFP, green fluorescent protein; HRP, horseradish peroxidase; MEK, MAPK kinase; MMP, matrix metalloproteinase; NF- $\kappa$ B, nuclear factor  $\kappa$ B; PTC, papillary thyroid cancer; TetR, Tet repressor; XIAP, X-linked inhibitor of apoptosis.

*Endocrinology* is published monthly by The Endocrine Society (<http://www.endo-society.org>), the foremost professional society serving the endocrine community.

NF- $\kappa$ B to translocate into the nucleus. NF- $\kappa$ B is a key regulator of genes involved in cellular proliferation and apoptosis (21). In tumor tissues, it is generally believed that the NF- $\kappa$ B-induced genes promote apoptotic resistance, transformation, cell growth, metastasis, and angiogenesis (22).

To investigate the possible mechanisms of BRAF<sup>V600E</sup>-dependent oncogenesis, we established a thyroid cancer cell line with doxycycline (Dox)-inducible BRAF<sup>V600E</sup> and also constructed an adenovirus vector carrying BRAF<sup>V600E</sup>. Here we report that BRAF<sup>V600E</sup>-induced NF- $\kappa$ B activation up-regulates its downstream target genes that are responsible for antiapoptotic behavior and invasiveness of thyroid cancer cells, consistent with the clinicopathological features of human PTCs with this mutation.

## Materials and Methods

### Reagents

Antibodies used in this work were as follows: anti-p50 polyclonal, anti-p65 polyclonal, anti-BRAF monoclonal, anti- $\beta$ -actin polyclonal (Santa Cruz Biotechnology, Santa Cruz, CA); anti-I $\kappa$ B- $\alpha$  polyclonal, anti-X-linked inhibitor of apoptosis (XIAP) polyclonal, anti-phospho-ERK1/2 monoclonal, anti-His-tag polyclonal, horseradish peroxidase (HRP)-conjugated antirabbit IgG, and antimouse IgG (Cell Signaling Technology, Beverly, MA); anti-c-IAP-1 polyclonal and anti-c-IAP-2 polyclonal (R&D Systems, Minneapolis, MN); anti-TetR polyclonal (Mö-BiTec, Göttingen, Germany); anti-proliferating cell nuclear antigen (PCNA) monoclonal (BD Transduction Laboratories, San Jose, CA).

Stock solutions of racemic dehydroxymethylepoxyquinomicin (DHMEQ) (10 mg/ml) were prepared in dimethyl sulfoxide and stored at –20°C until use (23). U0126 was purchased from Calbiochem (La Jolla, CA).

### Cell culture

Human thyroid cancer cell lines WRO and NPA were kindly provided by Dr. G. Juillard (University of California-Los Angeles, Los Angeles, CA) and KTC-3 was by Dr. J. Kurebayashi (Kawasaki Medical School, Okayama, Japan). All cells were cultured in RPMI 1640 supplemented with 10% fetal bovine serum and 1% (wt/vol) penicillin/streptomycin at 37°C in 5% CO<sub>2</sub>-95% air environment.

### Establishment of Dox-inducible BRAF<sup>V600E</sup> cells

A T-REx expression system (Invitrogen, Carlsbad, CA) was used to generate Dox-inducible BRAF<sup>V600E</sup> cells as directed by the manufacturer. Briefly, WRO cells were initially transfected with the regulatory vector (pcDNA6/TR), which encodes Tet repressor (TetR) and blasticidine-resistant gene, using Lipofectamine (Invitrogen). Blasticidine-resistant clones were selected by limiting dilution in 96-well plates in the medium containing 3  $\mu$ g/ml blasticidine (Promega, Madison, WI). The best clone with the highest expression of TetR (WRO-TetR cells) was determined by Western blot and further transfected with pcDNA5/TO carrying 6-Histidine-tagged BRAF<sup>V600E</sup> using Lipofectamine. The double transfectants were selected in the medium with 200  $\mu$ g/ml hygromycin and screened for Dox-inducible expression of BRAF<sup>V600E</sup> by immunoprecipitation with anti-BRAF antibody followed by Western blotting for 6-histidine tag.

### Adenovirus constructs

The BRAF<sup>V600E</sup> and green fluorescent protein (GFP) cDNAs were subcloned into pAdHM4CMV (24). The plasmids were linearized with *PacI* and transfected into human embryonal kidney 293 cells (HEK293; American Type Culture Collection, Manassas, VA) with SuperFect (QIAGEN, Valencia, CA). BRAF<sup>V600E</sup> and GFP-expressing adenoviruses (Ad-BRAF<sup>V600E</sup> and Ad-GFP) were propagated in HEK293 cells and purified by CsCl density-gradient centrifugation. The concentration of viral particle was determined by measuring the absorbance at 260 nm (25).

### Western blotting

Cells were lysed in a buffer containing 20 mM HEPES (pH 7.5), 0.35 M NaCl, 20% glycerol, 1% Nonidet P40, 1 mM MgCl<sub>2</sub>, 0.5 mM EDTA, 0.1 mM EGTA and protease inhibitor cocktail (Roche Diagnostics, Basel, Switzerland). Equal amount of protein was separated by 10% SDS-PAGE and transferred onto polyvinylidene difluoride membrane (Millipore Corp., Bedford, MA) by semidry blotting. After incubation with appropriate primary antibody, the antigen-antibody complexes were visualized using HRP-conjugated secondary antibody and enhanced chemiluminescence system (Amersham Biosciences, Piscataway, NJ).

### DNA-binding assay

The multiwell colorimetric assay for active NF- $\kappa$ B was performed as described previously (26, 27), using a TransAM NF- $\kappa$ B p65 and p50 transcription factor assay kit (Active Motif North America, Carlsbad, CA). Briefly, nuclear extracts were incubated in 96-well plates coated with immobilized oligonucleotides containing NF- $\kappa$ B consensus binding site. NF- $\kappa$ B binding to the target oligonucleotides was detected with primary antibody specific to p65 or p50 subunit and HRP-conjugated secondary antibody. For quantification, OD was read at 450 nm using a microplate reader ImmunoMini NJ-2300 (System Instruments, Tokyo, Japan).

### In vitro invasion assay

The Chemotaxicell Invasion Chamber (Kurabo, Osaka, Japan) was used according to the manufacturer's instructions. In brief,  $2.5 \times 10^3$  cells in serum-free medium were seeded onto matrigel-coated filters, and 5% fetal bovine serum was added to the lower wells as a chemoattractant. After incubation, the cells on the interior of the inserts were removed by swabbing, and the exterior of the inserts were stained with Diff-Quik staining kit (BD Biosciences, San Jose, CA). The cells that had penetrated through the filter were counted under bright-field microscopy.

### Statistical analysis

Differences between groups were examined for statistical significance using one-way ANOVA followed by Fisher's protected least significant difference or unpaired *t* test as appropriate. A *P* value not exceeding 0.05 was considered statistically significant.

## Results

### Activation of MAPK pathway in BRAF<sup>V600E</sup>-expressing cells

To explore the role of BRAF<sup>V600E</sup> in thyroid cancer cells, Dox-inducible BRAF<sup>V600E</sup>-expressing cells were generated using a thyroid carcinoma cell line WRO harboring wild-type BRAF (BRAF<sup>wt</sup>). The whole cell lysates of WRO cells transfected with Dox-inducible BRAF<sup>V600E</sup> (WRO-BRAF<sup>V600E</sup> cells) were immunoprecipitated with anti-BRAF antibody, and the precipitates containing both endogenous and exogenous BRAF (BRAF<sup>wt</sup> and BRAF<sup>V600E</sup>) were immunoblotted with anti-6-Histidine (His) antibody to detect only exogenous BRAF<sup>V600E</sup>. As shown in Fig. 1A, WRO-BRAF<sup>V600E</sup> cells showed a marked induction of BRAF<sup>V600E</sup> in a dose- and time-dependent manner.

Because BRAF is an upstream activator of MAPK kinase (MEK)/ERK pathway, we assessed the activation of MEK and ERK in the transfectants. In WRO-BRAF<sup>V600E</sup> cells, the induction of MEK and ERK phosphorylation was apparent 12 h after the addition of Dox (Fig. 1B), whereas no changes were observed in control WRO-TetR cells (Fig. 1B).

To further confirm the BRAF<sup>V600E</sup> effect, WRO cells were infected with recombinant adenovirus encoding BRAF<sup>V600E</sup>. The enhanced ERK phosphorylation was observed in the

FIG. 1. Activation of MAPK pathway in BRAF<sup>V600E</sup>-expressing cells. A, WRO-BRAF<sup>V600E</sup> cells were incubated with the indicated concentration of Dox for the indicated times. Total cell lysates were subjected to immunoprecipitation with anti-BRAF antibody and Western blot was done using anti-6-histidine (His) antibody. B, Cells were treated with 3.0 μg/ml Dox for the indicated times. Western blot was done using the indicated primary antibodies. Relative expressions determined by densitometry are shown below the bands. C, WRO cells were infected with Ad-BRAF<sup>V600E</sup> or Ad-GFP at 50 MOI (multiplicity of infection) and incubated for the indicated times. Western blot was done using the indicated antibodies. β-Actin level was used as a loading control. Similar results were obtained in three independent experiments. p, Phosphorylated; Ad, adenovirus.

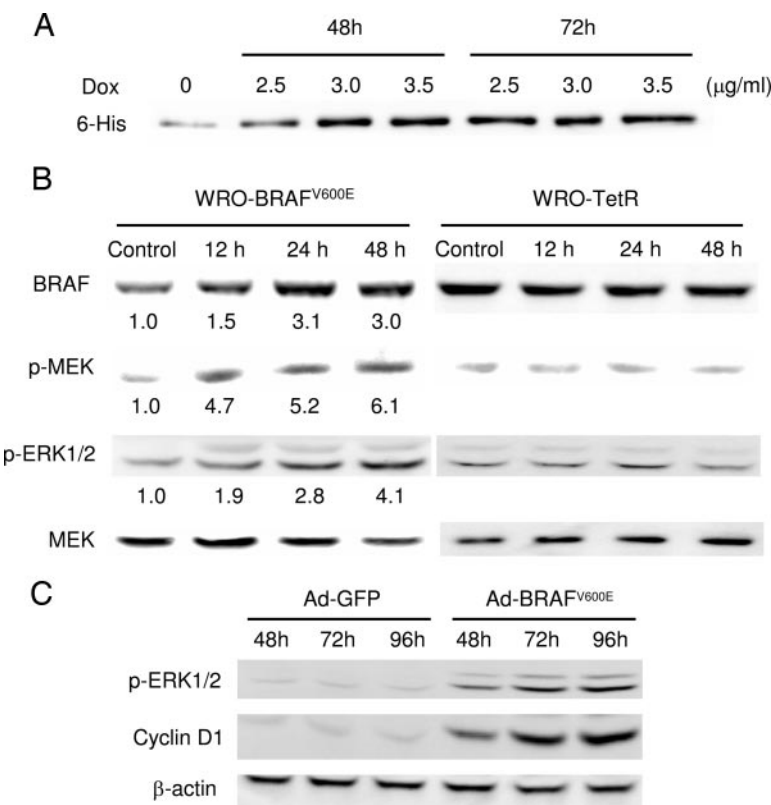

cells infected with Ad-BRAF<sup>V600E</sup> but not with Ad-GFP (Fig. 1C).

The MEK/ERK signaling pathway controls cell proliferation in part by modulating the transcription of genes involved in cell cycle regulation such as cyclin D1. Consistently, Western blotting analysis showed that cyclin D1 was up-regulated in a time-dependent manner in cells infected with Ad-BRAF<sup>V600E</sup> (Fig. 1C).

**BRAF<sup>V600E</sup> induces IκB-α degradation**

To determine whether BRAF<sup>V600E</sup> induces NF-κB activation through IκB-α degradation, we examined IκB-α expression by Western blot analysis in the both models. In Dox-inducible model, BRAF<sup>V600E</sup> expression attenuated IκB-α expression in WRO-BRAF<sup>V600E</sup> cells treated with Dox (Fig.

2A). In contrast, no degradation of IκB-α protein was seen in WRO-TetR cells (Fig. 2A). In the adenovirus model, IκB-α expression was similarly decreased by Ad-BRAF<sup>V600E</sup> (Fig. 2B). Note that IκB-α expression was slightly restored at 96 h after infection. This is perhaps due in part to NF-κB-dependent transcription of *NFKBIA* gene that encodes IκB-α (negative feedback loop) but not adenovirus degradation because ERK phosphorylation and cyclin D1 expression at this time point were the strongest (Fig. 1C).

**Induction of NF-κB DNA-binding activity in BRAF<sup>V600E</sup>-expressing cells**

To confirm the BRAF<sup>V600E</sup>-induced NF-κB activation in thyroid cells, we performed DNA-binding assay. In Dox-inducible WRO-BRAF<sup>V600E</sup> cells, NF-κB binding activity was

FIG. 2. Cytoplasmic degradation of IκB-α protein in BRAF<sup>V600E</sup>-expressing cells. A, Cells were incubated with or without 3.0 μg/ml Dox for the indicated times. Western blot was performed using indicated antibody. B, WRO cells were infected with Ad-BRAF<sup>V600E</sup> or Ad-GFP at 50 MOI (multiplicity of infection) and harvested at the indicated time points. Western blot was performed using anti-IκB-α antibody. β-Actin level was used as a loading control. Similar results were obtained in three independent experiments.

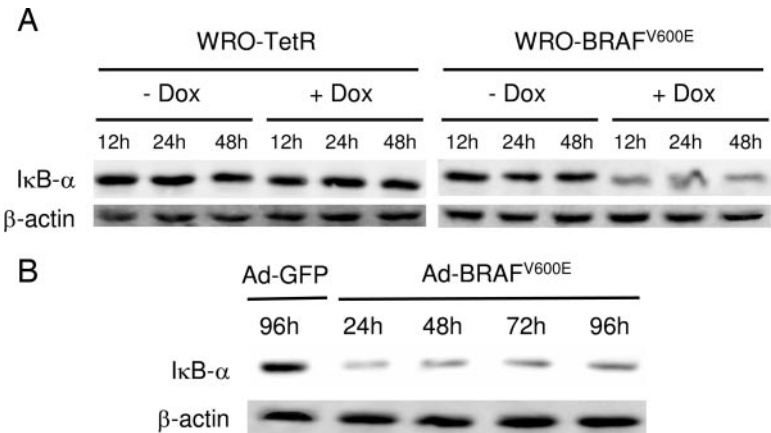



significantly elevated at 24 and 48 h after the addition of Dox (Fig. 3A). There was no significant difference in the ratio of p65:p50 subunit, indicating that the active DNA-binding complex was mostly p65/p50 heterodimer. NF- $\kappa$ B binding activity did not change in control WRO-TetR cells after the addition of Dox (data not shown).

NF- $\kappa$ B binding activity was also up-regulated in WRO cells infected with Ad-BRAF<sup>V600E</sup> (Fig. 3B). Treatment with DHMEQ, a specific NF- $\kappa$ B inhibitor (28), blocked the binding activity completely. On the other hand, treatment with U0126, a specific MEK inhibitor, had no effect on BRAF<sup>V600E</sup>-induced NF- $\kappa$ B activation. Similar results were obtained in another thyroid cancer cell line KTC-3 also harboring wild-type BRAF. These results indicate that BRAF<sup>V600E</sup> is a potent

activator of p65/p50 NF- $\kappa$ B transcription factor and this activating pathway is MEK independent in these cells.

#### BRAF<sup>V600E</sup> increases IAPs expression levels

To further confirm the functional downstream of BRAF<sup>V600E</sup>-induced NF- $\kappa$ B activation, the expression of c-IAP-1, c-IAP-2, and XIAP proteins, well-known NF- $\kappa$ B-dependent antiapoptotic factors (29–31), was analyzed in BRAF<sup>V600E</sup>-expressing cells. In WRO-BRAF<sup>V600E</sup> cells, the expression of all the IAPs was increased after the addition of Dox in a time-dependent manner (Fig. 4A). In WRO-TetR cells, on the other hand, there was no change in IAPs protein levels (Fig. 4A). In adenovirus-infected cells, c-IAP-1 and

FIG. 3. Effect of BRAF<sup>V600E</sup> expression on NF- $\kappa$ B DNA-binding activity. A, WRO-BRAF<sup>V600E</sup> cells were incubated with 3.0  $\mu$ g/ml Dox for the indicated times. Nuclear extracts were subjected to the DNA-binding assay as described in *Materials and Methods*. Cells treated with TNF- $\alpha$  were used as a positive control. \*,  $P < 0.05$  vs. control. B, Indicated cell lines were infected with Ad-BRAF<sup>V600E</sup> or Ad-GFP at 50 MOI (multiplicity of infection) and incubated for 72 h in the presence of indicated inhibitors (5  $\mu$ g/ml DHMEQ and/or 10  $\mu$ M U0126). Cells exposed to 10 Gy of  $\gamma$ -rays were used as a positive control. \*\*,  $P < 0.05$  vs. Ad-GFP control; \*,  $P < 0.05$  vs. Ad-BRAF<sup>V600E</sup> control. A and B, Each bar indicates the mean and SD of the data collected in triplicate. Data are representative of three separate experiments.

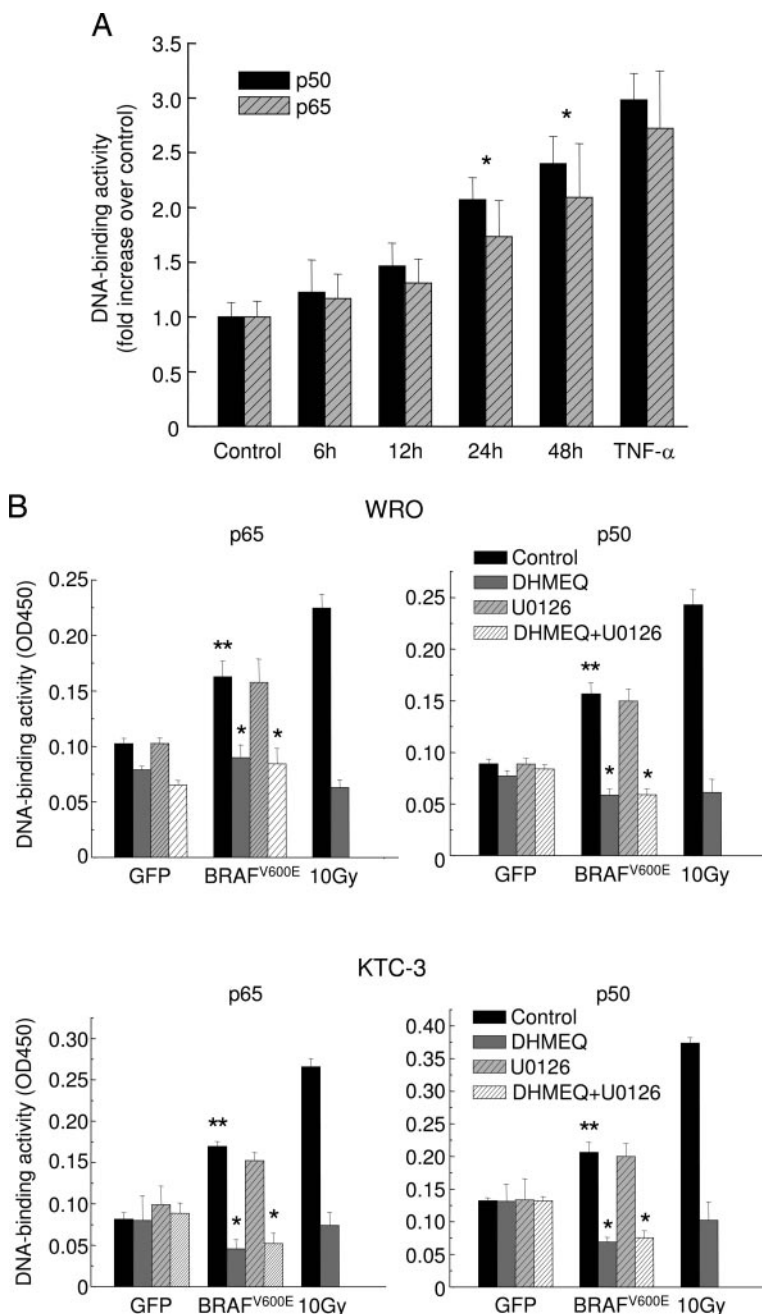

FIG. 4. Expression levels of IAP family proteins in BRAF<sup>V600E</sup>-expressing cells. A, Indicated cell lines were incubated with or without 3.0 μg/ml Dox for the indicated times. B, Indicated cell lines were infected with Ad-BRAF<sup>V600E</sup> or Ad-GFP at 50 MOI (multiplicity of infection) with or without inhibitors (5 μg/ml DHMEQ and/or 10 μM U0126) and harvested at 96 h. A and B, Western blot was performed using the indicated antibodies. Relative expressions determined by densitometry are shown below the bands. β-Actin level was used as a loading control. Similar results were obtained in three independent experiments.

c-IAP-2 were similarly up-regulated in cells infected with Ad-BRAF<sup>V600E</sup>, and this induction was blocked in the presence of DHMEQ but not U0126 (Fig. 4B).

BRAF<sup>V600E</sup> enhances invasiveness of thyroid cancer cells

We next evaluated the functional consequence of BRAF<sup>V600E</sup>-induced NF-κB activation. Because NF-κB induces a variety of genes that play an important role in invasion and metastasis of cancer cells, we explored the involvement of BRAF<sup>V600E</sup>/NF-κB activation in cell invasiveness.

FIG. 5. Expression levels of MMPs in BRAF<sup>V600E</sup>-expressing cells. A, Cells were incubated with or without 3.0 μg/ml Dox for the indicated times. B, Cells were infected with Ad-BRAF<sup>V600E</sup> or Ad-GFP at 50 MOI in the presence of indicated inhibitors (5 μg/ml DHMEQ and/or 10 μM U0126) and harvested at 96 h. A and B, Western blot was performed using the indicated antibodies. Relative expressions determined by densitometry are shown below the bands. β-actin level was used as a loading control. Similar results were obtained in three independent experiments.

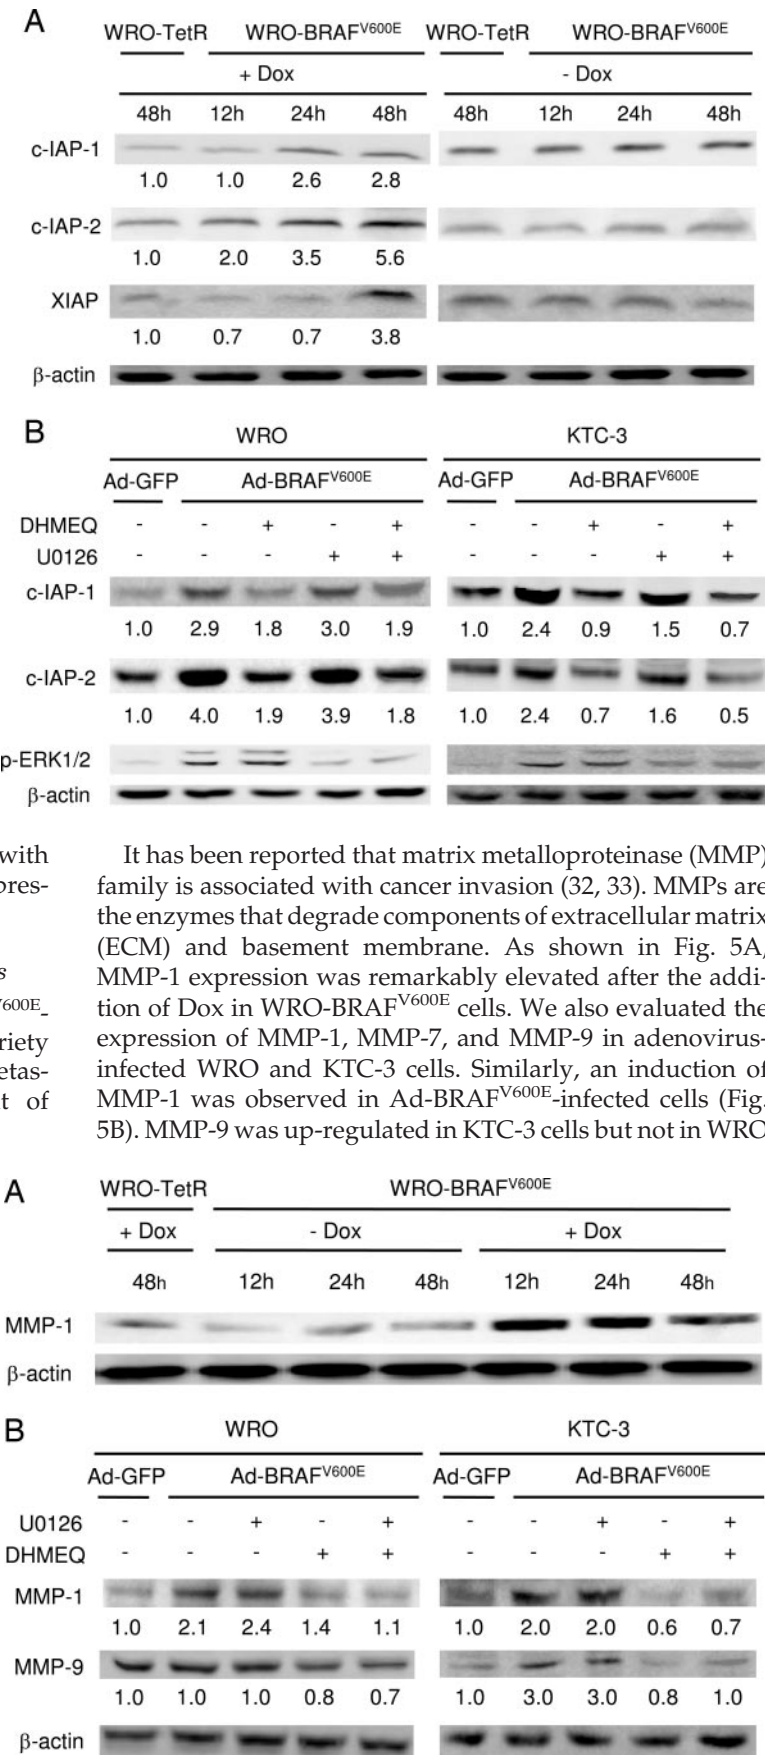

cells (Fig. 5B). There was no change in MMP-7 expression in both lines (data not shown). These BRAF<sup>V600E</sup>-induced MMP-1/MMP-9 accumulations were completely blocked in cells treated with DHMEQ but not changed with U0126 (Fig. 5B).

We next performed functional assay to investigate the consequence of BRAF<sup>V600E</sup> expression on cell invasiveness. BRAF<sup>V600E</sup> expression enhanced matrigel invasion by approximately 2-fold in the Dox-inducible model (Fig. 6A). In adenovirus-infected cells, BRAF<sup>V600E</sup> overexpression also robustly enhanced invasiveness (Fig. 6B). Because BRAF<sup>V600E</sup> did not confer a significant growth advantage on the cells (data not shown), the observed difference in cell invasiveness was not due to the increase in cell number. Interestingly, there were some differences between WRO and KTC-3 cells in the experiments with U0126 and DHMEQ. U0126 attenuated BRAF<sup>V600E</sup>-induced cell invasiveness by about 60% in KTC-3 cells, but produced no effect in WRO cells (Fig. 6B). DHMEQ blunted the invasiveness by half in WRO cells but completely blocked in KTC-3 cells (Fig. 6B). In addition, to

further strengthen our observation, we used PTC cell line NPA in key experiments even though this line harbors BRAF<sup>V600E</sup>. As shown in Fig. 6C, BRAF<sup>V600E</sup> overexpression clearly enhanced p50/p65 translocation and cell invasiveness. As a whole, these results demonstrated the involvement of NF-κB pathway in BRAF<sup>V600E</sup>-induced cell migration and invasion.

## Discussion

In PTCs, *RET/PTC* and *NTRK* rearrangements and point mutations of *RAS* and *BRAF*, all of which activate MAPK pathway, are cumulatively found in approximately 70% of cases and they are mutually exclusive (2, 5, 34). This provides a compelling genetic evidence that constitutive active MAPK signaling is a key component of transformation to PTC.

However, each of these oncoproteins elicits clearly distinct phenotypic features and biological behaviors. For example, *RAS* mutation or *PAX8*-peroxisome proliferator-activated re-

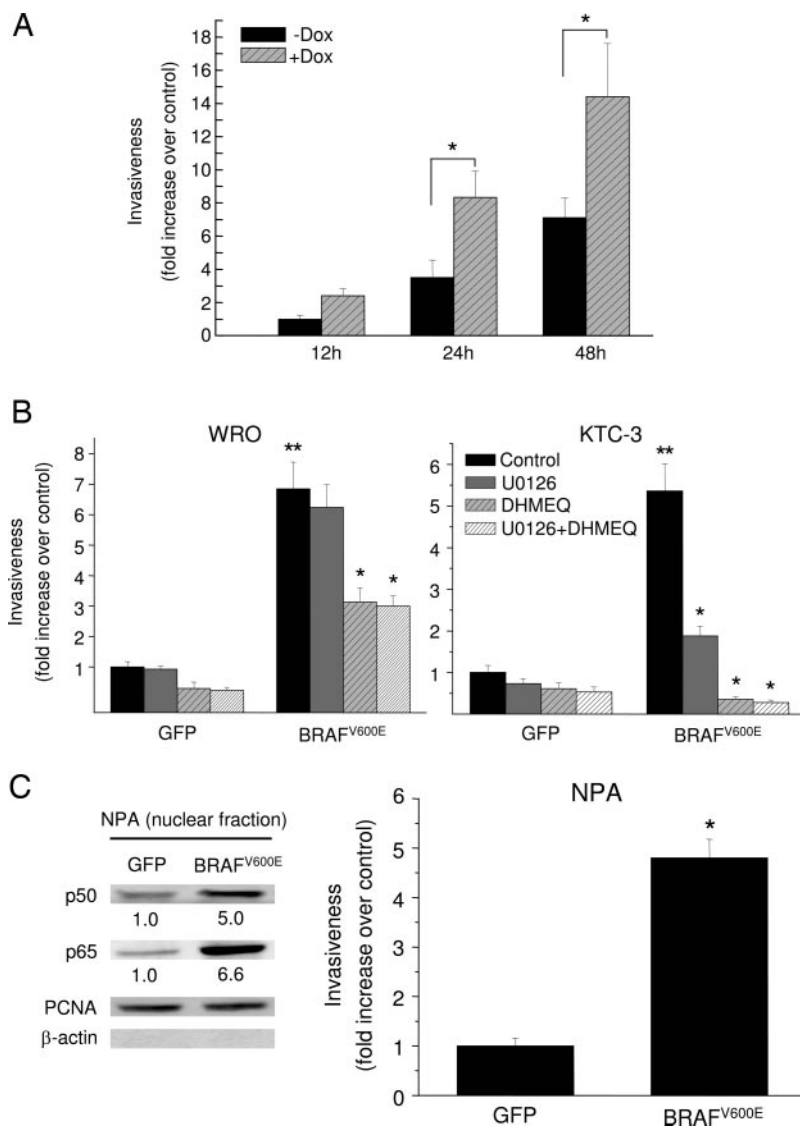

FIG. 6. BRAF<sup>V600E</sup> enhances invasiveness of thyroid cancer cells. **A**, WRO-BRAF<sup>V600E</sup> cells were seeded onto the matrigel-coated filters with or without 3 μg/ml Dox. Plates were incubated at 37°C in 5% CO<sub>2</sub> for the indicated times and subjected to invasion assay. \*, *P* < 0.05. **B**, Indicated cells were seeded onto the matrigel-coated filters, infected with Ad-BRAF<sup>V600E</sup> or Ad-GFP at 50 MOI (multiplicity of infection). Plates were incubated at 37°C in 5% CO<sub>2</sub> for 72 h with or without inhibitors (5 μg/ml DHMEQ and/or 10 μM U0126) and subjected to invasion assay. \*\*, *P* < 0.05 vs. GFP control, \*, *P* < 0.05 vs. BRAF<sup>V600E</sup> control. **C (Left)**, NPA cells were infected with Ad-BRAF<sup>V600E</sup> or Ad-GFP at 50 MOI (multiplicity of infection) and incubated for 72 h. Nuclear extracts were subjected to Western blotting using indicated primary antibodies. Relative expressions determined by densitometry are shown below the bands. PCNA (proliferating cell nuclear antigen) level was used as a loading control. β-Actin was used as a negative control for nuclear extracting. **Right**, NPA cells were seeded onto the matrigel-coated filters, infected with Ad-BRAF<sup>V600E</sup> or Ad-GFP at 50 MOI. Plates were incubated at 37°C in 5% CO<sub>2</sub> for 72 h and subjected to invasion assay. \*, *P* < 0.05 vs. GFP control. A–C, Each bar indicates the mean and SD of the data collected in triplicate. Data are representative of three separate experiments.



ceptor  $\gamma$  recombination was more frequently found in follicular variant of PTC (35, 36), whereas PTCs with conventional growth pattern and tall-cell features often harbor mutated *BRAF*, which has been reported to associate with extrathyroidal invasion (8) and distant metastasis (6). Using microarray technique, Giordano *et al.* (37) have demonstrated that gene expression profiles, despite a profound overlapping, were discernible in PTCs harboring *RET/PTC* or mutant *RAS* and *BRAF*. Thus, besides the common propensity to activate MAPK signaling, PTC-specific oncogenes also evoke alternative pathways, and the diversity of clinicopathological manifestations is likely due to the different spectrum of downstream genes activated by each oncoprotein.

The primary purpose of this study was to explore the mechanisms by which BRAF<sup>V600E</sup> induces invasion and metastasis of thyroid cancer cells. To address this issue, we first established a Dox-inducible BRAF<sup>V600E</sup> clonal line derived from human thyroid cancer cell WRO harboring wild-type *BRAF*. However, Dox-inducible systems often show leaky expression even in the absence of Dox, or additional genetic changes might be acquired during sequential selection steps. In our WRO-BRAF<sup>V600E</sup> cells, Western blot for His-tag showed a faint expression of BRAF<sup>V600E</sup> in the absence of Dox, indicating small leakiness. To complement our experiments, we used another system, the adenovirus vector carrying BRAF<sup>V600E</sup> and another cell line, KTC-3, also harboring wild-type *BRAF*. In both systems, we confirmed BRAF<sup>V600E</sup>-induced ERK phosphorylation.

CRAF, which is another isoform of RAF family proteins and similarly transmits signals from RAS to MEK, has been shown to activate NF- $\kappa$ B. Vale *et al.* (20) have demonstrated that CRAF-induced transformation of NIH3T3 cells requires the activation of NF- $\kappa$ B-IL-1 autocrine loop. We and others have reported that NF- $\kappa$ B plays an important role in a variety of thyroid cancer cells (27, 28, 38). In terms of the relationship between *BRAF* mutation and NF- $\kappa$ B activation, only one group, to our knowledge, has reported that oncogenic BRAF<sup>V600E</sup> up-regulates NF- $\kappa$ B transcriptional activity in NIH3T3 cells (39, 40). In the present work, we showed that the degradation of I $\kappa$ B- $\alpha$ , a cytoplasmic inhibitor of NF- $\kappa$ B, started shortly after a sufficient accumulation of BRAF<sup>V600E</sup> protein, resulting in the activation of NF- $\kappa$ B signaling. A specific NF- $\kappa$ B inhibitor, DHMEQ, efficiently blocked BRAF<sup>V600E</sup>-induced NF- $\kappa$ B activation. Interestingly, however, this activation was independent of MEK-ERK pathway. This is consistent with a previous report showing that the constitutive active mutant of MEK failed to induce NF- $\kappa$ B-dependent gene expression in NIH3T3 cells, whereas RAS<sup>V12</sup> or CRAF<sup>BXB</sup> (both are also constitutive active mutants) were capable of it (20). NF- $\kappa$ B is known as a potent regulator of antiapoptotic genes. Distortions of apoptotic processes are the main contributors to tumor formation and tumor cell resistance to therapeutic agents.

The family of IAPs, which are under transcriptional control of NF- $\kappa$ B, has been shown to play a principal role in the suppression of apoptotic cell death (41–43). In our setting, the protein expression of IAP family was induced after BRAF<sup>V600E</sup> expression in thyroid cells, suggesting that BRAF<sup>V600E</sup> contributes to inducing apoptotic resistance. This induction was also NF- $\kappa$ B dependent and MEK-ERK independent.

Tumor invasion and metastasis require proteolytic degradation of ECM and basement membrane by MMPs. The MMPs are zinc-dependent endopeptidases subdivided into collagenases, gelatinases, stromelysins, and matrilysins on the basis of their specificity for ECM components (32). One of the MMP family members involved in the breakdown of the most abundant ECM proteins, collagen type I and III, is interstitial collagenase, MMP-1. In our model, BRAF<sup>V600E</sup> induced MMP-1 expression in both WRO and KTC-3 cells and MMP-9 in KTC-3 cells. The promoter of *MMP-1* contains several AP-1 binding sites. Recent studies have shown that the AP-1 site must cooperate with a variety of cis-acting sequences found in the upstream of the promoter to up-regulate *MMP-1* transcription (44). For example, induction of *MMP-1* by IL-1 in rabbit fibroblasts requires the interaction between the AP-1 site at –77 bp and a NF- $\kappa$ B-like element located at –3030 bp. Whereas both IL-1 and TNF- $\alpha$  activate NF- $\kappa$ B pathway, only IL-1 is capable of inducing *MMP-1* transcription in rabbit primary synovial fibroblasts (45). Presumably, this is due to the inability of TNF- $\alpha$  to activate MAPK pathway in these cells, whereas IL-1 activates both. On the other hand, Reunanen *et al.* (46) reported that TNF- $\alpha$  induced ERK phosphorylation and *MMP-1* up-regulation in human skin fibroblasts, and PD98059, another MEK inhibitor, had no effect on modulating the *MMP-1* mRNA and protein expression. Thus, the regulation of *MMP-1* expression seems to be cell type specific. In our model using thyroid cancer cells, *MMP-1* protein level appeared to be regulated by only NF- $\kappa$ B pathway but not by MEK-ERK signaling.

Although the promoter of *MMP-9* also contains both AP-1 and NF- $\kappa$ B binding sites (47), MAPK pathway was not involved in *MMP-9* up-regulation in KTC-3 cells. In WRO cells, BRAF<sup>V600E</sup> did not induce *MMP-9* expression; however, the basal *MMP-9* expression in WRO cells was relatively higher than in KTC-3 cells, implying the possibility that the induction was already saturated by other oncogenic signals in this type of cells.

We also observed the increased invasiveness of thyroid cancer cells after BRAF<sup>V600E</sup> expression. The BRAF<sup>V600E</sup>-induced cell invasiveness was correspondingly observed in papillary cancer cell line NPA, suggesting that this mechanism is well conserved in thyroid cells. In WRO cells, U0126 did not reduce BRAF<sup>V600E</sup>-induced cell invasiveness, which was consistent with Western blot for *MMP-1*. However, in KTC-3 cells, U0126 suppressed the invasiveness by about 60%. There are several possible explanations. Some degree of increased invasiveness could result from elevated activity of MAPK pathway alone. It has been reported that active MAPK may influence cell migration and metastasis through modulating the expression of integrins (48) and also the integrin distribution in cancers is associated with tumor progression (49). Active MAPK is also able to directly phosphorylate myosin light chain kinase leading to enhanced phosphorylation of myosin light chain and in turn stress fiber assembly (50). These mechanisms may participate in the induction of thyroid cell invasion after the expression of BRAF<sup>V600E</sup> oncoprotein. However, the treatment with DHMEQ alone completely blocked BRAF<sup>V600E</sup>-induced cell invasiveness in KTC-3 cells and reduced by half in WRO

cells, suggesting that NF-κB is a potent downstream factor directly affecting BRAF<sup>V600E</sup>-induced cell invasiveness.

In conclusion, our results demonstrate that BRAF<sup>V600E</sup> activates NF-κB signaling independently of MAPK pathway in thyroid cancer cells, and enhances cell invasion, presumably via NF-κB-MMP expression. Specific NF-κB inhibitors such as DHMEQ may therefore be useful for the treatment of more aggressive thyroid cancers carrying BRAF<sup>V600E</sup> mutation by dampening not only apoptotic resistance but also cell invasiveness.

### Acknowledgments

Received March 28, 2006. Accepted August 28, 2006.

Address all correspondence and requests for reprints to: Hiroyuki Namba, M.D., Ph.D., Department of Molecular Medicine, Atomic Bomb Disease Institute, Nagasaki University Graduate School of Biomedical Sciences, 1-12-4 Sakamoto, Nagasaki 852-8523, Japan. E-mail: namba@net.nagasaki-u.ac.jp.

This work was supported in part by Grants-in-Aid for Scientific Research (A) 15256004 and (B) 15390295 from the Ministry of Education, Culture, Sports, Science and Technology of Japan.

Disclosure Statement: The authors have nothing to disclose.

### References

- Davies H, Bignell GR, Cox C, Stephens P, Edkins S, Clegg S, Teague J, Woffendin H, Garnett MJ, Bottomley W, Davis N, Dicks E, Ewing R, Floyd Y, Gray K, Hall S, Hawes R, Hughes J, Kosmidou V, Menzies A, Mould C, Parker A, Stevens C, Watt S, Wilson R, Jayatilake H, Gusterson BA, Cooper C, Shipley J, Hargrave D, Pritchard-Jones K, Maitland N, Chenevix-Trench G, Riggins GJ, Bigner DD, Palmieri G, Cossu A, Flanagan A, Nicholson A, Ho JW, Leung SY, Yuen ST, Weber BL, Seigler HF, Darrow TL, Paterson H, Marais R, Marshall CJ, Wooster R, Stratton MR, Futreal PA 2002 Mutations of the BRAF gene in human cancer. *Nature* 417:949–954
- Kimura ET, Nikiforova MN, Zhu Z, Knauf JA, Nikiforov YE, Fagin JA 2003 High prevalence of BRAF mutations in thyroid cancer: genetic evidence for constitutive activation of the RET/PTC-RAS-BRAF signaling pathway in papillary thyroid carcinoma. *Cancer Res* 63:1454–1457
- Cohen Y, Xing M, Mambo E, Guo Z, Wu G, Trink B, Beller U, Westra WH, Ladenson PW, Sidransky D 2003 BRAF mutation in papillary thyroid carcinoma. *J Natl Cancer Inst* 95:625–627
- Xing M, Vasko V, Tallini G, Larin A, Wu G, Udelsman R, Ringel MD, Ladenson PW, Sidransky D 2004 BRAF T1796A transversion mutation in various thyroid neoplasms. *J Clin Endocrinol Metab* 89:1365–1368
- Soares P, Trovisco V, Rocha AS, Lima J, Castro P, Preto A, Maximo V, Botelho T, Seruca R, Sobrinho-Simoes M 2003 BRAF mutations and RET/PTC rearrangements are alternative events in the etiopathogenesis of PTC. *Oncogene* 22:4578–4580
- Namba H, Nakashima M, Hayashi T, Hayashida N, Maeda S, Rogounovitch TI, Ohtsuru A, Saenko VA, Kanematsu T, Yamashita S 2003 Clinical implication of hot spot BRAF mutation, V599E, in papillary thyroid cancers. *J Clin Endocrinol Metab* 88:4393–4397
- Xu X, Quiros RM, Gattuso P, Ain KB, Prinz RA 2003 High prevalence of BRAF gene mutation in papillary thyroid carcinomas and thyroid tumor cell lines. *Cancer Res* 63:4561–4567
- Nikiforova MN, Kimura ET, Gandhi M, Biddinger PW, Knauf JA, Basolo F, Zhu Z, Giannini R, Salvatore G, Fusco A, Santoro M, Fagin JA, Nikiforov YE 2003 BRAF mutations in thyroid tumors are restricted to papillary carcinomas and anaplastic or poorly differentiated carcinomas arising from papillary carcinomas. *J Clin Endocrinol Metab* 88:5399–5404
- Fukushima T, Suzuki S, Mashiko M, Ohtake T, Endo Y, Takebayashi Y, Sekikawa K, Hagiwara K, Takenoshita S 2003 BRAF mutations in papillary carcinomas of the thyroid. *Oncogene* 22:6455–6457
- Wan PT, Garnett MJ, Roe SM, Lee S, Niculescu-Duvaz D, Good VM, Jones CM, Marshall CJ, Springer CJ, Barford D, Marais R 2004 Mechanism of activation of the RAF-ERK signaling pathway by oncogenic mutations of B-Raf. *Cell* 116:855–867
- Fugazzola L, Mannavola D, Cirello V, Vannucchi G, Muzza M, Vicentini L, Beck-Peccoz P 2004 BRAF mutations in an Italian cohort of thyroid cancers. *Clin Endocrinol (Oxf)* 61:239–243
- Puxeddu E, Moretti S, Elisei R, Romei C, Pascucci R, Martinelli M, Marino C, Avenia N, Rossi ED, Fadda G, Cavaliere A, Ribacchi R, Falorni A, Pontecorvi A, Pacini F, Pinchera A, Santeusano F 2004 BRAF(V599E) mutation is the leading genetic event in adult sporadic papillary thyroid carcinomas. *J Clin Endocrinol Metab* 89:2414–2420
- Kim TY, Kim WB, Song JY, Rhee YS, Gong G, Cho YM, Kim SY, Kim SC, Hong SJ, Shong YK 2005 The BRAF mutation is not associated with poor prognostic factors in Korean patients with conventional papillary thyroid microcarcinoma. *Clin Endocrinol (Oxf)* 63:588–593
- Liu RT, Chen YJ, Chou FF, Li CL, Wu WL, Tsai PC, Huang CC, Cheng JT 2005 No correlation between BRAFV600E mutation and clinicopathological features of papillary thyroid carcinomas in Taiwan. *Clin Endocrinol (Oxf)* 63:461–466
- Xing M, Westra WH, Tufano RP, Cohen Y, Rosenbaum E, Rhoden KJ, Carson KA, Vasko V, Larin A, Tallini G, Tolane S, Holt EH, Hui P, Umbricht CB, Basaria S, Ewertz M, Tufano AP, Califano JA, Ringel MD, Zeiger MA, Sidransky D, Ladenson PW 2005 BRAF mutation predicts a poorer clinical prognosis for papillary thyroid cancer. *J Clin Endocrinol Metab* 90:6373–6379
- Knauf JA, Ma X, Smith EP, Zhang L, Mitsutake N, Liao XH, Refetoff S, Nikiforov YE, Fagin JA 2005 Targeted expression of BRAFV600E in thyroid cells of transgenic mice results in papillary thyroid cancers that undergo dedifferentiation. *Cancer Res* 65:4238–4245
- Baumann B, Weber CK, Troppmair J, Whiteside S, Israel A, Rapp UR, Wirth T 2000 Raf induces NF-κB by membrane shuttle kinase MEKK1, a signaling pathway critical for transformation. *Proc Natl Acad Sci USA* 97:4615–4620
- McCarthy SA, Samuels ML, Pritchard CA, Abraham JA, McMahon M 1995 Rapid induction of heparin-binding epidermal growth factor/diphtheria toxin receptor expression by Raf and Ras oncogenes. *Genes Dev* 9:1953–1964
- Kerkhoff E, Rapp UR 1997 Induction of cell proliferation in quiescent NIH 3T3 cells by oncogenic c-Raf-1. *Mol Cell Biol* 17:2576–2586
- Vale T, Ngo TT, White MA, Lipsky PE 2001 Raf-induced transformation requires an interleukin 1 autocrine loop. *Cancer Res* 61:602–607
- Barkett M, Gilmore TD 1999 Control of apoptosis by Rel/NF-κB transcription factors. *Oncogene* 18:6910–6924
- Baldwin AS 2001 Control of oncogenesis and cancer therapy resistance by the transcription factor NF-κB. *J Clin Invest* 107:241–246
- Matsumoto N, Ariga A, To-e S, Nakamura H, Agata N, Hirano S, Inoue J, Umezawa K 2000 Synthesis of NF-κB activation inhibitors derived from epoxyquinomicin C. *Bioorg Med Chem Lett* 10:865–869
- Mizuguchi H, Kay MA 1999 A simple method for constructing E1- and E1/E4-deleted recombinant adenoviral vectors. *Hum Gene Ther* 10:2013–2017
- Mittereder N, March KL, Trapnell BC 1996 Evaluation of the concentration and bioactivity of adenovirus vectors for gene therapy. *J Virol* 70:7498–7509
- Renard P, Ernest I, Houbion A, Art M, Le Calvez H, Raes M, Remacle J 2001 Development of a sensitive multi-well colorimetric assay for active NFκB. *Nucleic Acids Res* 29:E21
- Starenki D, Namba H, Saenko V, Ohtsuru A, Yamashita S 2004 Inhibition of nuclear factor-κB cascade potentiates the effect of a combination treatment of anaplastic thyroid cancer cells. *J Clin Endocrinol Metab* 89:410–418
- Starenki DV, Namba H, Saenko VA, Ohtsuru A, Maeda S, Umezawa K, Yamashita S 2004 Induction of thyroid cancer cell apoptosis by a novel nuclear factor κB inhibitor, dehydroxymethyl epoxyquinomicin. *Clin Cancer Res* 10:6821–6829
- Wang CY, Mayo MW, Korneluk RG, Goeddel DV, Baldwin Jr AS 1998 NF-κB antiapoptosis: induction of TRAF1 and TRAF2 and c-IAP1 and c-IAP2 to suppress caspase-8 activation. *Science* 281:1680–1683
- Zou T, Rao JN, Guo X, Liu L, Zhang HM, Strauch ED, Bass BL, Wang JY 2004 NF-κB-mediated IAP expression induces resistance of intestinal epithelial cells to apoptosis after polyamine depletion. *Am J Physiol Cell Physiol* 286:C1009–C1018
- Hubinger G, Schneider C, Stohr D, Ruff H, Kirchner D, Schwanen C, Schmid M, Bergmann L, Muller E 2004 CD30-induced up-regulation of the inhibitor of apoptosis genes cIAP1 and cIAP2 in anaplastic large cell lymphoma cells. *Exp Hematol* 32:382–389
- Egeblad M, Werb Z 2002 New functions for the matrix metalloproteinases in cancer progression. *Nat Rev Cancer* 2:161–174
- Stamenkovic I 2000 Matrix metalloproteinases in tumor invasion and metastasis. *Semin Cancer Biol* 10:415–433
- Frattini M, Ferrario C, Bressan P, Balestra D, De Cecco L, Mondellini P, Bongarzone I, Collini P, Gariboldi M, Pilotti S, Pierotti MA, Greco A 2004 Alternative mutations of BRAF, RET and NTRK1 are associated with similar but distinct gene expression patterns in papillary thyroid cancer. *Oncogene* 23:7436–7440
- Castro P, Rebocho AP, Soares RJ, Magalhaes J, Roque L, Trovisco V, Vieira de Castro I, Cardoso-de-Oliveira M, Fonseca E, Soares P, Sobrinho-Simoes M 2006 PAX8-PPARγ rearrangement is frequently detected in the follicular variant of papillary thyroid carcinoma. *J Clin Endocrinol Metab* 91:213–220
- Castro P, Roque L, Magalhaes J, Sobrinho-Simoes M 2005 A subset of the follicular variant of papillary thyroid carcinoma harbors the PAX8-PPARγ translocation. *Int J Surg Pathol* 13:235–238
- Giordano TJ, Quirk R, Thomas DG, Misk DE, Vinco M, Sanders D, Zhu Z, Ciampi R, Roh M, Shedden K, Gauger P, Doherty G, Thompson NW, Hanash S, Koenig RJ, Nikiforov YE 2005 Molecular classification of papillary thyroid carcinoma: distinct BRAF, RAS, and RET/PTC mutation-specific gene expression profiles discovered by DNA microarray analysis. *Oncogene* 24:6646–6656
- Visconti R, Cerutti J, Battista S, Fedele M, Trapasso F, Zeki K, Miano MP, de Nigris F, Casalino L, Curcio F, Santoro M, Fusco A 1997 Expression of the



- neoplastic phenotype by human thyroid carcinoma cell lines requires NF $\kappa$ B p65 protein expression. *Oncogene* 15:1987–1994
39. Ikenoue T, Hikiba Y, Kanai F, Tanaka Y, Imamura J, Imamura T, Ohta M, Ijichi H, Tateishi K, Kawakami T, Aragaki J, Matsumura M, Kawabe T, Omata M 2003 Functional analysis of mutations within the kinase activation segment of B-Raf in human colorectal tumors. *Cancer Res* 63:8132–8137
40. Ikenoue T, Hikiba Y, Kanai F, Aragaki J, Tanaka Y, Imamura J, Imamura T, Ohta M, Ijichi H, Tateishi K, Kawakami T, Matsumura M, Kawabe T, Omata M 2004 Different effects of point mutations within the B-Raf glycine-rich loop in colorectal tumors on mitogen-activated protein/extracellular signal-regulated kinase/extracellular signal-regulated kinase and nuclear factor  $\kappa$ B pathway and cellular transformation. *Cancer Res* 64:3428–3435
41. LaCasse EC, Baird S, Korneluk RG, MacKenzie AE 1998 The inhibitors of apoptosis (IAPs) and their emerging role in cancer. *Oncogene* 17:3247–3259
42. Deveraux QL, Roy N, Stennicke HR, Van Arsedale T, Zhou Q, Srinivasula SM, Alnemri ES, Salvesen GS, Reed JC 1998 IAPs block apoptotic events induced by caspase-8 and cytochrome c by direct inhibition of distinct caspases. *EMBO J* 17:2215–2223
43. Salvesen GS, Duckett CS 2002 IAP proteins: blocking the road to death's door. *Nat Rev Mol Cell Biol* 3:401–410
44. Vincenti MP, Brinckerhoff CE 2002 Transcriptional regulation of collagenase (MMP-1, MMP-13) genes in arthritis: integration of complex signaling pathways for the recruitment of gene-specific transcription factors. *Arthritis Res* 4:157–164
45. Barchowsky A, Frelte D, Vincenti MP 2000 Integration of the NF- $\kappa$ B and mitogen-activated protein kinase/AP-1 pathways at the collagenase-1 promoter: divergence of IL-1 and TNF-dependent signal transduction in rabbit primary synovial fibroblasts. *Cytokine* 12:1469–1479
46. Reunanen N, Li SP, Ahonen M, Foschi M, Han J, Kahari VM 2002 Activation of p38  $\alpha$  MAPK enhances collagenase-1 (matrix metalloproteinase (MMP)-1) and stromelysin-1 (MMP-3) expression by mRNA stabilization. *J Biol Chem* 277:32360–32368
47. Overall CM, Lopez-Otin C 2002 Strategies for MMP inhibition in cancer: innovations for the post-trial era. *Nat Rev Cancer* 2:657–672
48. Woods D, Cherwinski H, Venetsanakos E, Bhat A, Gysin S, Humbert M, Bray PF, Saylor VL, McMahon M 2001 Induction of  $\beta$ 3-integrin gene expression by sustained activation of the Ras-regulated Raf-MEK-extracellular signal-regulated kinase signaling pathway. *Mol Cell Biol* 21:3192–3205
49. Albelda SM, Mette SA, Elder DE, Stewart R, Damjanovich L, Herlyn M, Buck CA 1990 Integrin distribution in malignant melanoma: association of the  $\beta$ 3 subunit with tumor progression. *Cancer Res* 50:6757–6764
50. Klemke RL, Cai S, Giannini AL, Gallagher PJ, de Lanerolle P, Cheres DA 1997 Regulation of cell motility by mitogen-activated protein kinase. *J Cell Biol* 137:481–492

*Endocrinology* is published monthly by The Endocrine Society (<http://www.endo-society.org>), the foremost professional society serving the endocrine community.
